# Supplementary material for: Chloroplast and mitochondrial DNA editing in plants
Source: Research Square preprint supplement (doi:10.21203/rs.3.rs-145710/v1), 2021-01-20

**Supplementary Information**

**Chloroplast and mitochondrial DNA editing in plants**

**Table of Contents**

**Supplementary Figure**

Supplementary Figure 1. Chloroplast and mitochondrial base editing strategy.

Supplementary Figure 2. Frequencies of base editing in the psbB gene.

Supplementary Figure 3. Base editing efficiencies in the mitochondrial RPS14 gene.

Supplementary Figure 4. Chloroplast genome targeted base editing efficiencies in calli.

Supplementary Figure 5. Mitochondrial genome targeted base editing efficiencies in calli.

Supplementary Figure 6. DNA-free base editing.

**Supplementary Table**

Supplementary Table 1. PCR primers used in this study.

**Supplementary Sequences**

Supplementary Sequences 1. DNA sequences of plasmid components.

Supplementary Sequences 2. Amino acid sequences of DdCBE components.

Supplementary Sequences 3. Amino acid sequences of TALE repeats.


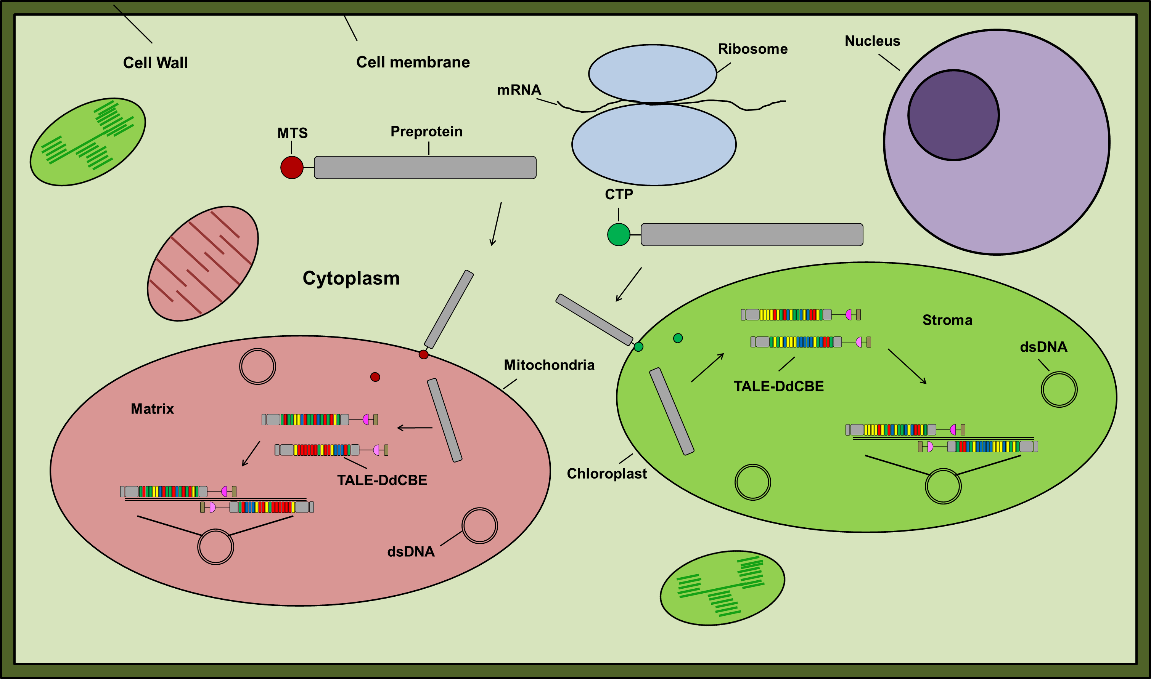


**Supplementary Figure 1. Chloroplast and mitochondrial base editing strategy.** Because cp-DdCBE and mt-DdCBE preproteins (precursor proteins) respectively contain a chloroplast transit peptide (CTP) or a mitochondrial targeting signal (MTS), they are imported into chloroplasts and mitochondria after translation in plant cells. The preproteins cross the outer and inner organelle membranes, after which CTP and MTS are respectively cleaved by stromal processing peptidase and mitochondrial processing peptidase, and cp-DdCBE and mt-DdCBE (the mature proteins) take on their final conformation.


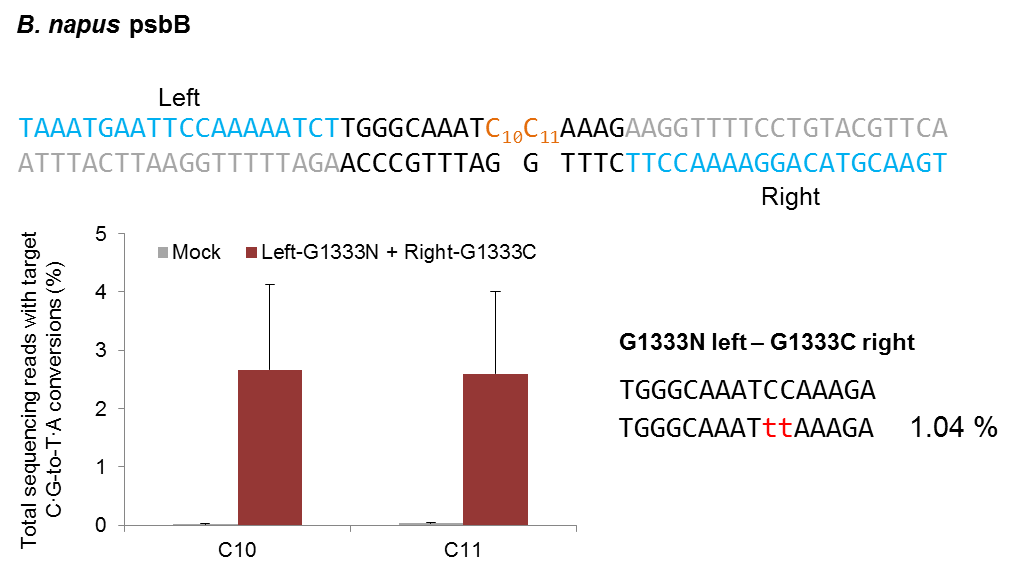


**Supplementary Figure 2. Frequencies of base editing in the psbB gene.** Plasmids encoding the cp-DdCBE pair Left-G1333-N + Right-G1333-C, which is targeted to the chloroplast psbB gene, were transfected into rapeseed protoplasts, after which base editing efficiencies in the spacer region were analyzed by targeted deep sequencing. TALE-binding regions, target cytosines, and converted nucleotides are shown in blue, orange, and red, respectively. Frequencies (mean±s.d.) were calculated from n=3 independent experiments.


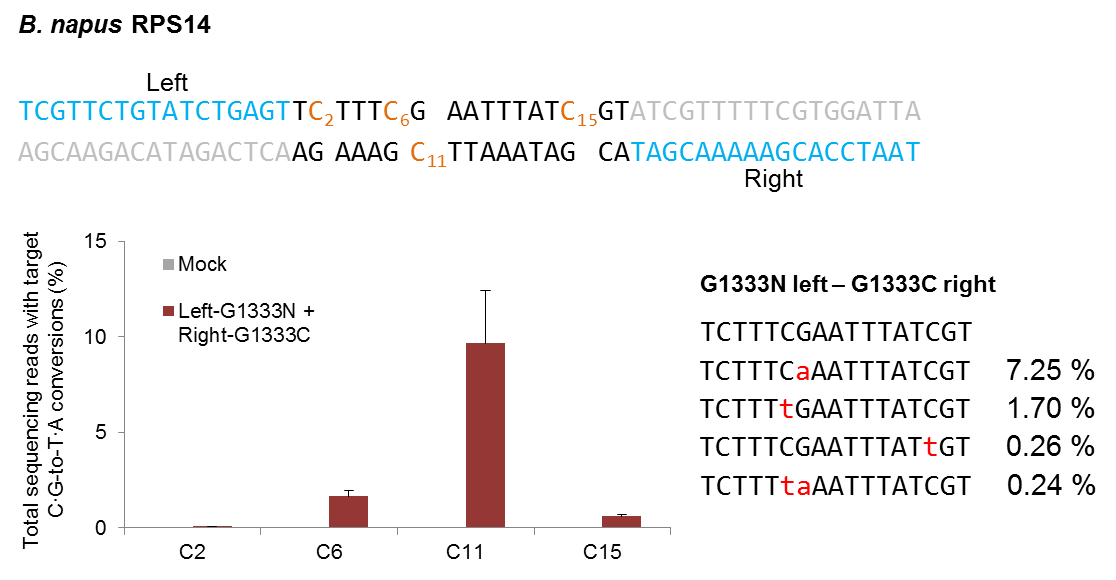


**Supplementary Figure 3. Base editing efficiencies in the mitochondrial RPS14 gene.** Plasmids encoding the mt-DdCBE pair Left-G1333-N + Right-G1333-C, which is targeted to the RPS14 gene, were transfected into rapeseed protoplasts, after which the efficiencies of C-to-T conversion were analyzed by targeted deep sequencing. TALE binding regions, target cytosines, and converted nucleotides are shown in blue, orange, and red, respectively. Frequencies (mean±s.d.) were calculated from n=3 independent experiments.


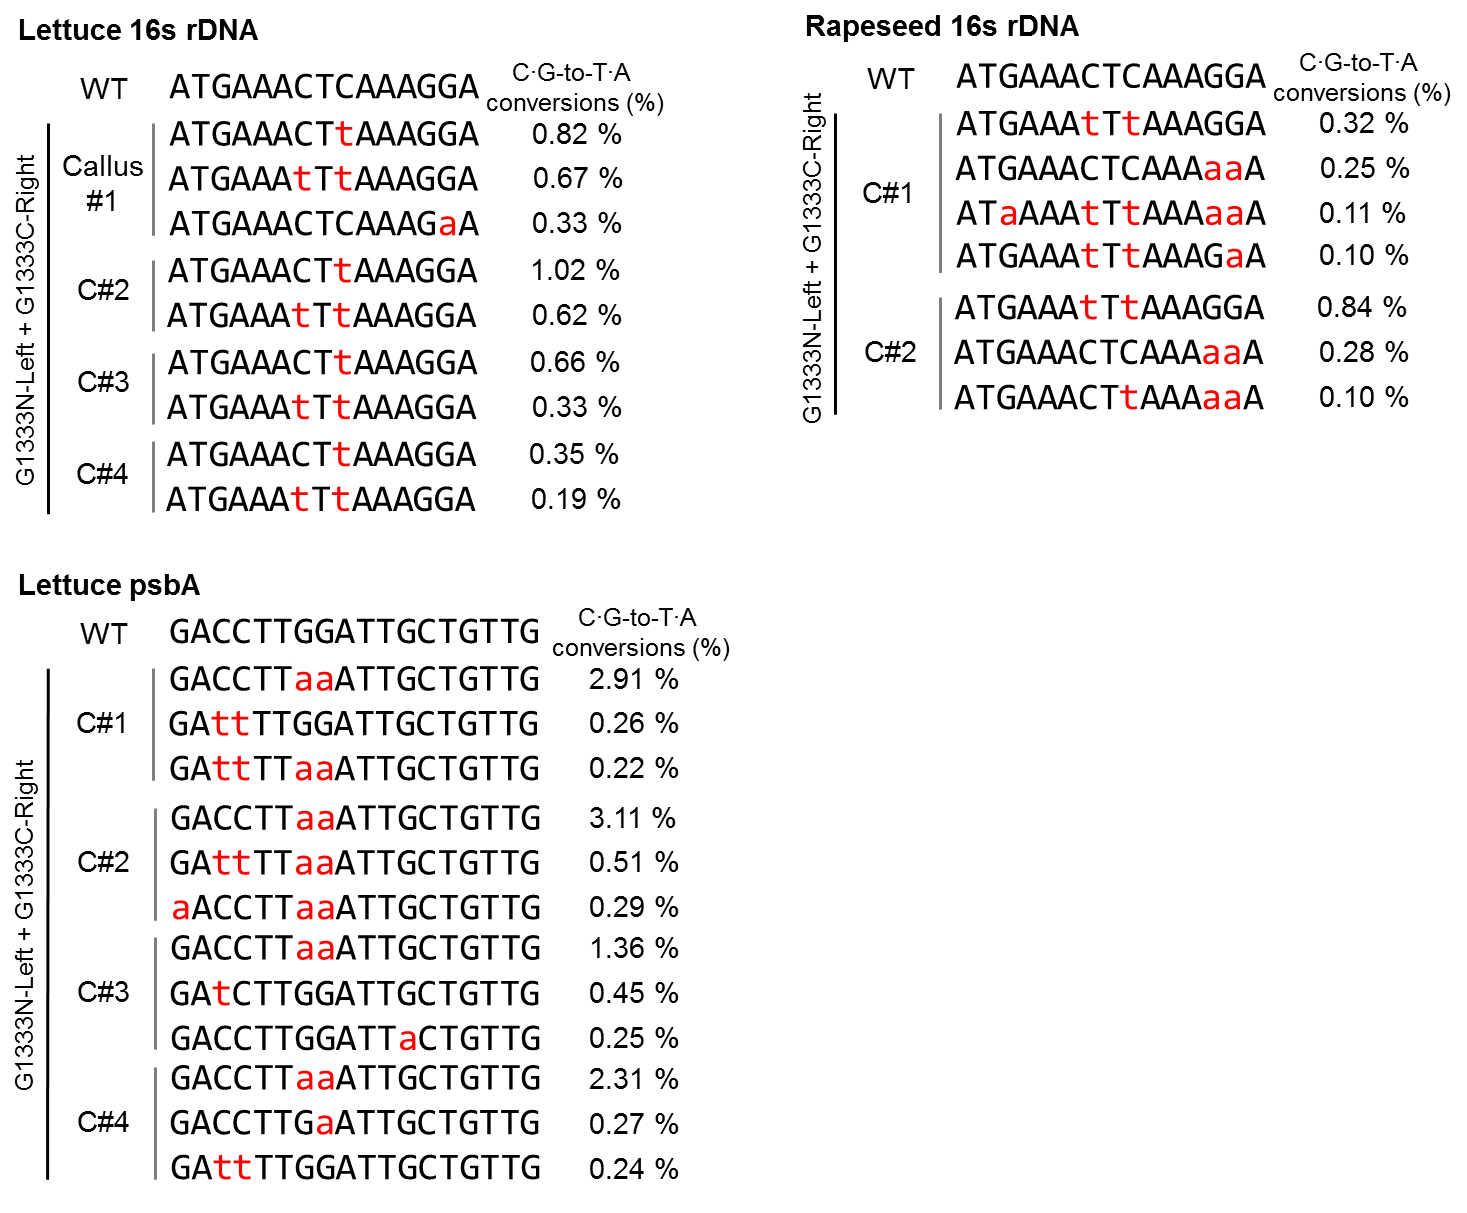


**Supplementary Figure 4. Chloroplast genome targeted base editing efficiencies in calli.** The frequencies and patterns of DdCBE-mediated base editing at targeted sites in 16s rDNA and psbA in lettuce and rapeseed calli after 4 weeks of culture. Converted nucleotides in the spacer region are shown in red.


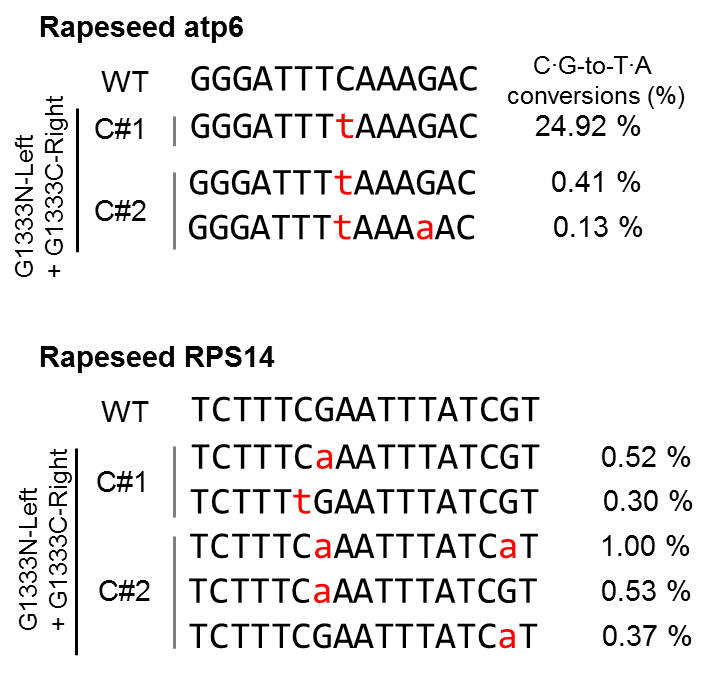


**Supplementary Figure 5. Mitochondrial genome targeted base editing efficiencies in calli.** The frequencies and patterns of DdCBE-mediated base editing at targeted sites in the ATP6 and RPS14 genes in rapeseed calli, revealed by targeted deep sequencing. Converted nucleotides in the target spacer regions are shown in red.


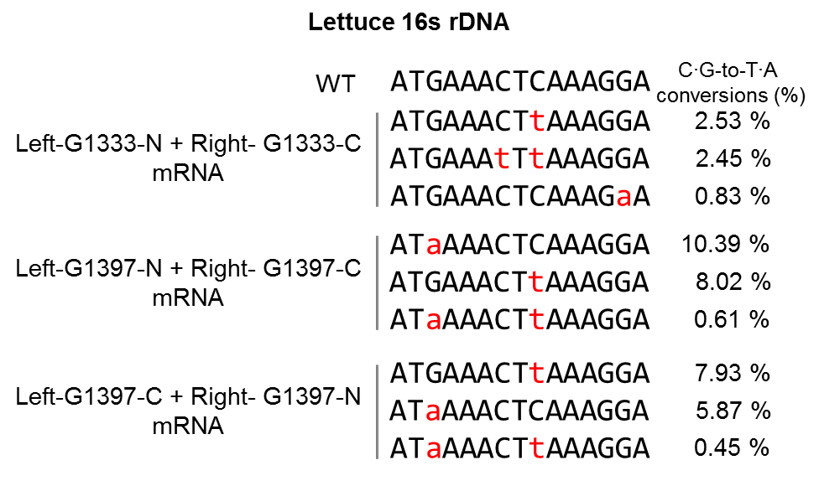


**Supplementary Figure 6. DNA-free base editing.** Frequencies and patterns of base editing in the chloroplast at the targeted site in 16s rDNA after transfection of DdCBE mRNAs into lettuce protoplasts. Targeted deep sequencing was performed after protoplasts were incubated for 7 days. Converted nucleotides in the target spacer region are shown in red.

**Supplementary Table 1. PCR primers used in this study.**

| Primer name | Primer sequence (5’-3’) | Purpose |
| --- | --- | --- |
| 16s nested F | GCTCGCGTCTGATTAGCTAG | Targeted deep sequencing 16s rDNA 1st PCR |
| 16s nested R | AACGAATTCACCGCCGTATG | Targeted deep sequencing 16s rDNA 1st PCR |
| 16s 2nd F | ACACTCTTTCCCTACACGACGCTCTTCCGATCT CGTATCGACCCGTGCAGT | Targeted deep sequencing 16s rDNA 2nd PCR |
| 16s 2nd R | GACTGGAGTTCAGACGTGTGCTCTTCCGATCT GGCACCCCTCTCTTTCAAGA | Targeted deep sequencing 16s rDNA 2nd PCR |
| PA nested F | GACTGCAATTTTAGAGAGACGC | Targeted deep sequencing psbA1st PCR |
| PA nested R | CGTTCATGCATAACTTCCATACC | Targeted deep sequencing psbA1st PCR |
| PA 2nd Bn F | ACACTCTTTCCCTACACGACGCTCTTCCGATCT ATTGTTCTACACTTTTTACTTGG | Targeted deep sequencing psbA 2nd PCR in rapeseed |
| PA 2nd Bn, Ls R | GACTGGAGTTCAGACGTGTGCTCTTCCGATCT ATTCCTAGAGGCATACCATC | Targeted deep sequencing psbA 2nd PCR |
| PA 2nd Ls F | ACACTCTTTCCCTACACGACGCTCTTCCGATCT TTGTTCTACACTTCTTACTTGG | Targeted deep sequencing psbA 2nd PCR in lettuce |
| PB nested F | GGTTTGCCTTGGTATCGTGT | Targeted deep sequencing psbB1st PCR |
| PB nested R | ACTCAACAGTTACACCTACTTGT | Targeted deep sequencing psbB1st PCR |
| PB 2nd F | ACACTCTTTCCCTACACGACGCTCTTCCGATCT TTGGCATTGGGTATATTGGGA | Targeted deep sequencing psbB 2nd PCR |
| PB 2nd R | GACTGGAGTTCAGACGTGTGCTCTTCCGATCT TCGGATACCCATATTCCAGGAC | Targeted deep sequencing psbB 2nd PCR |
| ATP6 nested F | GTCCCCACTTGACCAATTTGA | Targeted deep sequencing ATP61st PCR |
| ATP6 nested R | ATAGTCCAAGCGAACCCACT | Targeted deep sequencing ATP61st PCR |
| ATP6 2nd F | ACACTCTTTCCCTACACGACGCTCTTCCGATCT TAGCTTCACAGTGACAAGTC | Targeted deep sequencing ATP6 2nd PCR |
| ATP6 2nd R | GACTGGAGTTCAGACGTGTGCTCTTCCGATCT GCTTAATGCGCGAAAACAAT | Targeted deep sequencing ATP6 2nd PCR |
| RPS14 nested F | ACACAAGATGAGACTTTACCACT | Targeted deep sequencing RPS141st PCR |
| RPS14 nested R | GGGAGCATACTTGACAGGAAA | Targeted deep sequencing RPS141st PCR |
| RPS14 2nd F | ACACTCTTTCCCTACACGACGCTCTTCCGATCT AGTTGTCCAAGTTGCCAAGA | Targeted deep sequencing RPS14 2nd PCR |
| RPS14 2nd R | GACTGGAGTTCAGACGTGTGCTCTTCCGATCT TCTATTGGTTTGGTGGTTGCT | Targeted deep sequencing RPS14 2nd PCR |
| mRNA F | TTCATCTCATCCGTTTAGAAGCT | mRNA IVT template |
| mRNA R | CCATTTGCATTTTGATGTCCGA | mRNA IVT template |

**Supplementary sequences 1. DNA sequences of plasmid components.**

**Parsley ubiquitin promoter**

CTAGCAACGATTGTACAATTGCTTCTTTAAAAAAGGAAGAAAGAAAGAAAGAAAAGAATCAACATCAGCGTTAACAAACGGCCCCGTTACGGCCCAAACGGTCATATAGAGTAACGGCGTTAAGCGTTGAAAGACTCCTATCGAAATACGTAACCGCAAACGTGTCATAGTCAGATCCCCTCTTCCTTCACCGCCTCAAACACAAAAATAATCTTCTACAGCCTATATATACAACCCCCCCTTCTATCTCTCCTTTCTCACAATTCATCATCTTTCTTTCTCTACCCCCAATTTTAAGAAATCCTCTCTTCTCCTCTTCATTTTCAAGGTAAATCTCTCTCTCTCTCTCTCTCTCTGTTATTCCTTGTTTTAATTAGGTATGTATTATTGCTAGTTTGTTAATCTGCTTATCTTATGTATGCCTTATGTGAATATCTTTATCTTGTTCATCTCATCCGTTTAGAAGCTATAAATTTGTTGATTTGACTGTGTATCTACACGTGGTTATGTTTATATCTAATCAGATATGAATTTCTTCATATTGTTGCGTTTGTGTGTACCAATCCGAAATCGTTGATTTTTTTCATTTAATCGTGTAGCTAATTGTACGTATACATATGGATCTACGTATCAATTGTTCATCTGTTTGTGTTTGTATGTATACAGATCTGAAAACATCACTTCTCTCATCTGATTGTGTTGTTACATACATAGATATAGATCTGTTATATCATTTTTTTTATTAATTGTGTATATATATATGTGCATAGATCTGGATTACATGATTGTGATTATTTACATGATTTTGTTATTTACGTATGTATATATGTAGATCTGGACTTTTTGGAGTTGTTGACTTGATTGTATTTGTGTGTGTATATGTGTGTTCTGATCTTGATATGTTATGTATGTGCAGC

**T7 promoter**

TAATACGACTCACTATAGG

**pea3A terminator**

CAGGCCTCCCAGCTTTCGTCCGTATCATCGGTTTCGACAACGTTCGTCAAGTTCAATGCATCAGTTTCATTGCCCACACACCAGAATCCTACTAAGTTTGAGTATTATGGCATTGGAAAAGCTGTTTTCTTCTATCATTTGTTCTGCTTGTAATTTACTGTGTTCTTTCAGTTTTTGTTTTCGGACATCAAAATGCAAATGGATGGATAAGAGTTAATAAATGATATGGTCCTTTTGTTCATTCTCAAATTATTATTATCTGTTGTTTTTACTTTAATGGGTTGAATTTAAGTAAGAAAGGAACTAACAGTGTGATATTAAGGTGCAATGTTAGACATATAAAACAGTCTTTCACCTCTCTTTGGTTATGTCTTGAATTGGTTTGTTTCTTCACTTATCTGTGTAATCAAGTTTACTATGAGTCTATGATCAAGTAATTATGCAATCAAGTTAAGTACAGTATAGGCTT

**Supplementary sequences 2. Amino acid sequences of DdCBE components.**


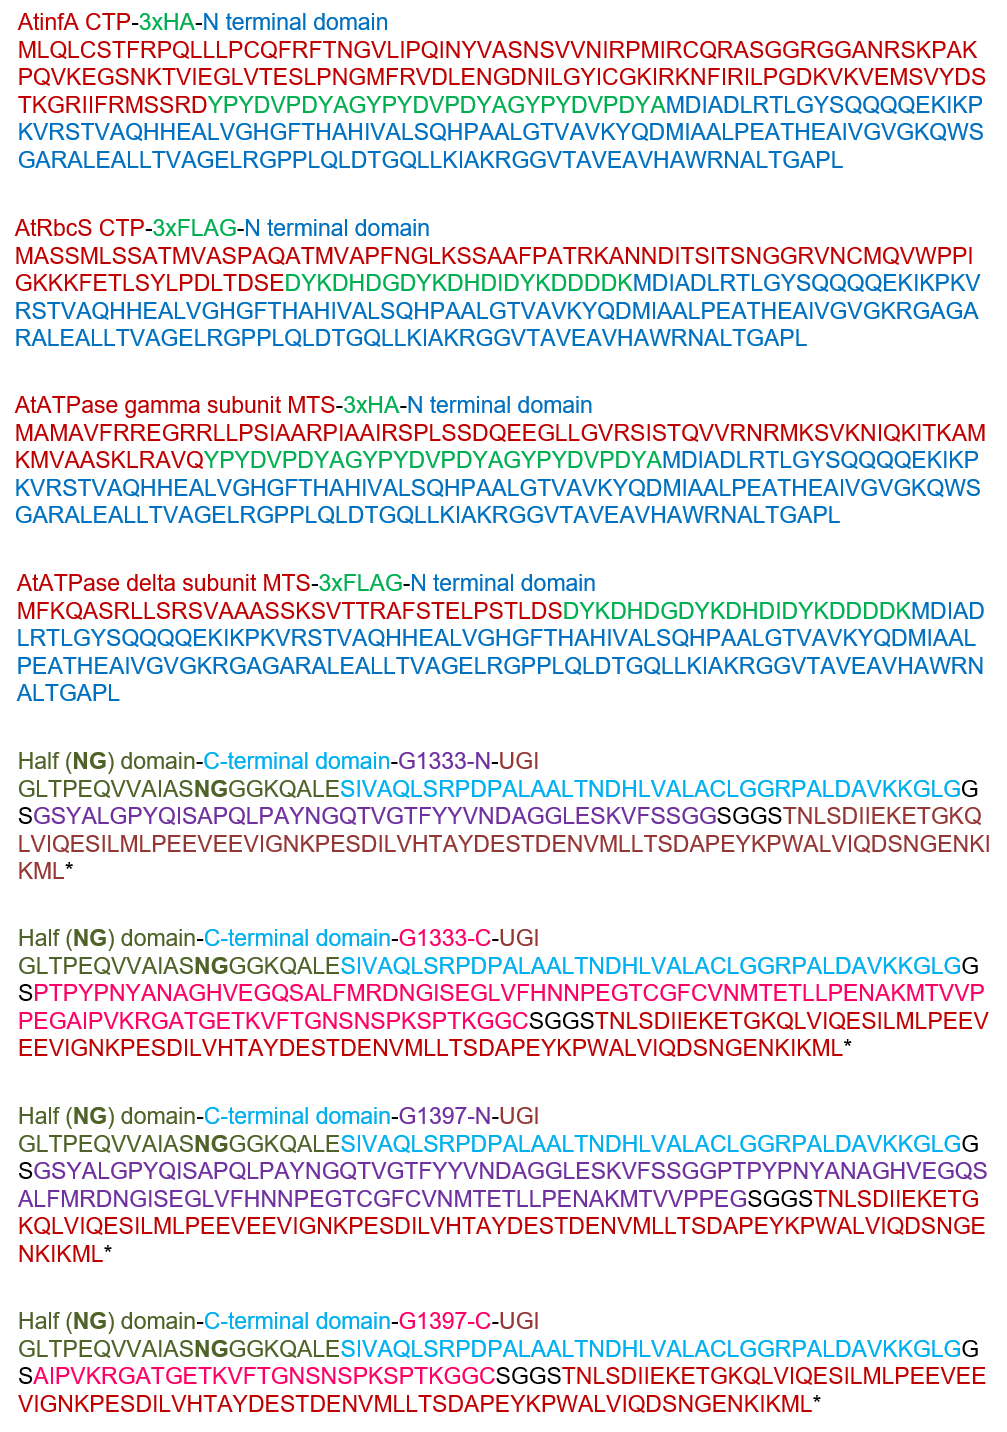


**Supplementary sequences 3. Amino acid sequences of TALE repeats.**


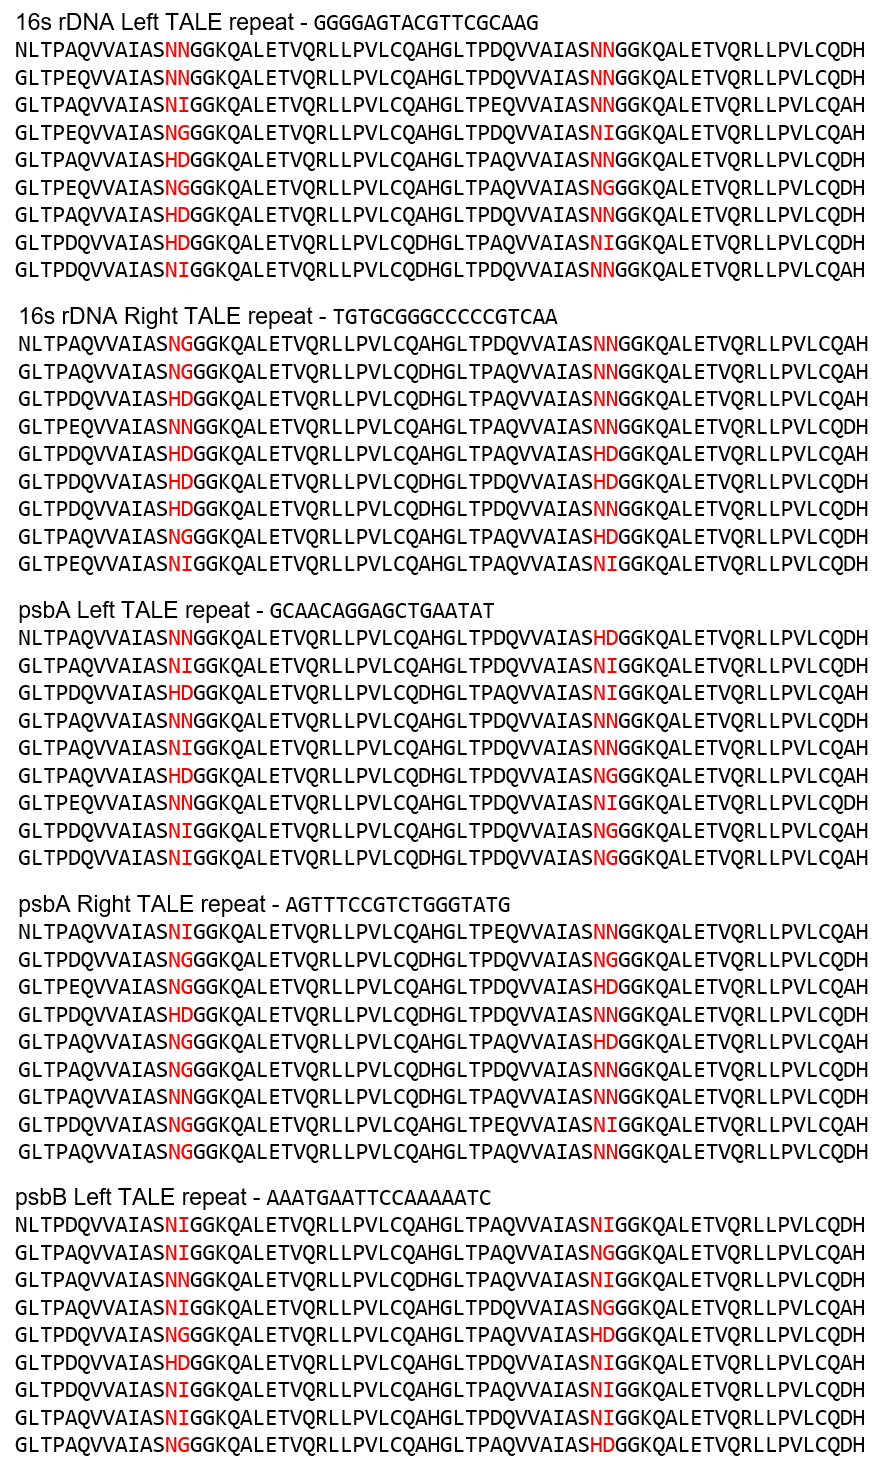


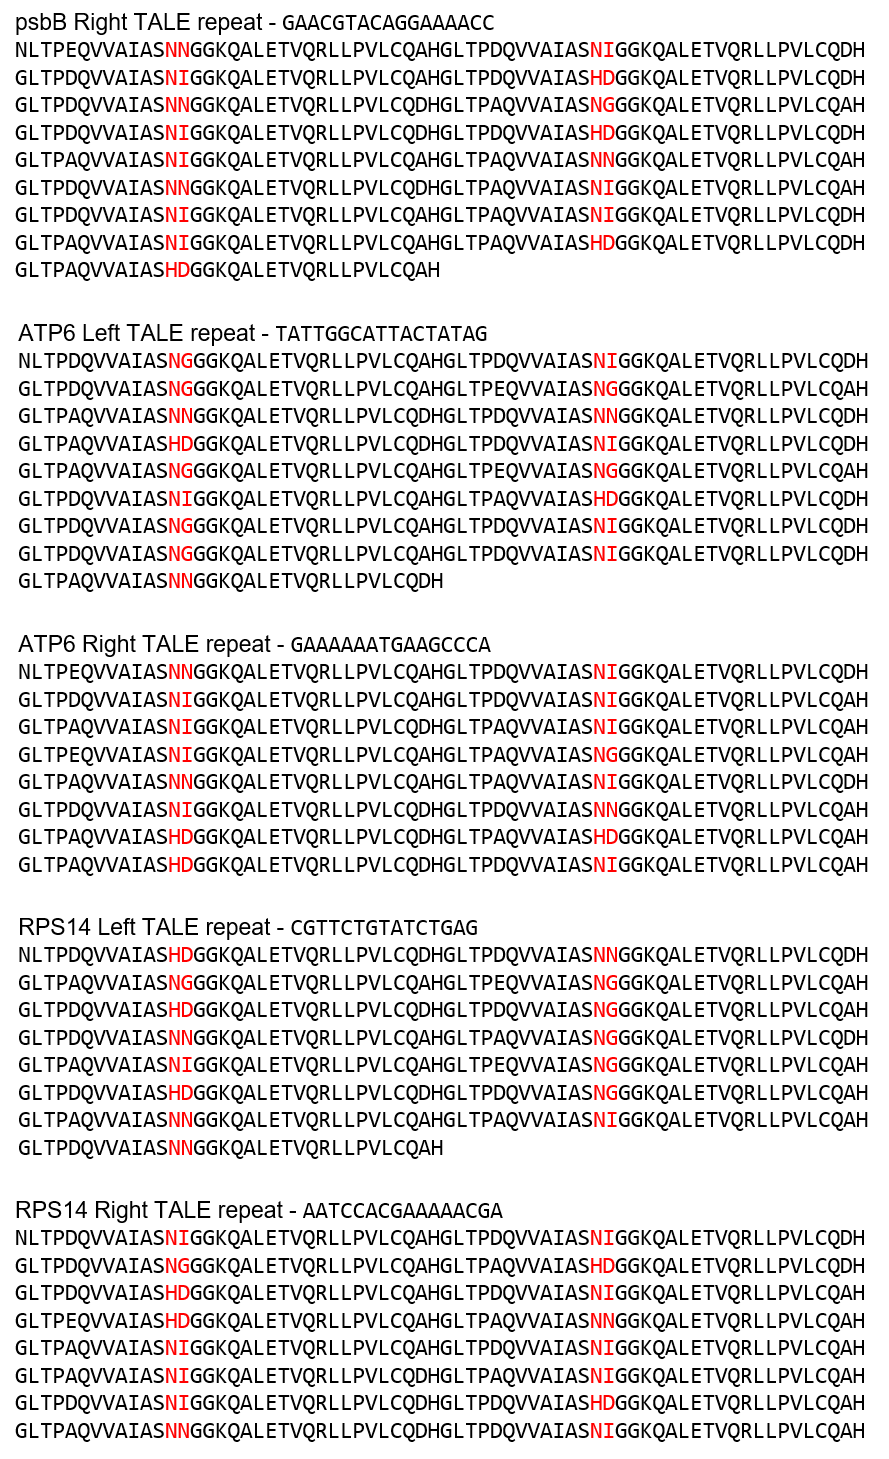

Supplement: Supplementary file 1 [file d85d981190106efae4b0b50b.docx]
